# Supplementary material for: Colloidal stabilization of hydrophobic InSe 2D nanosheets in a model environmental aqueous solution and their impact on Shewanella oneidensis MR-1
Source: Royal Society of Chemistry journal article supplement (doi:10.1039/d3en00382e), 2023-10-31
Supplement: d3en00382e1.pdf [file d3en00382e1.pdf]

## **Colloidal Stabilization of Hydrophobic InSe 2D Nanosheets in a Model Environmental Aqueous Solution and their Impact on *Shewanella oneidensis* MR-1**

Shreyasi Sengupta<sup>a</sup>, Swapnil B. Ambade<sup>a</sup>, Tana L. O'Keefe<sup>b</sup>, Falak Tawakalna<sup>c</sup>, Jenny K. Hedlund Orbeck<sup>d</sup>, Robert J. Hamers<sup>d</sup>, Z. Vivian Feng<sup>c,e</sup>, Christy L. Haynes<sup>b</sup> and Zeev Rosenzweig<sup>a\*</sup>

<sup>a</sup>Department of Chemistry and Biochemistry, University of Maryland Baltimore County, Baltimore, MD 21250, United States

<sup>b</sup>Department of Chemistry, University of Minnesota, 207 Pleasant Street SE, Minneapolis, Minnesota 55455, United States

<sup>c</sup>Chemistry Department, Augsburg University, Minneapolis, Minnesota 55454, United States

<sup>d</sup>Department of Chemistry, University of Wisconsin Madison, Madison, Wisconsin 53706, United States

<sup>e</sup>Council on Science and Technology, Princeton University, Princeton, NJ 08544, United States

### **Electronic SI**

Some characterization of InSe nanomaterials are shown in the supporting information document. Figure S1 shows the dynamic light scattering (DLS) size measurement of unmodified versus EGCG-modified InSe nanosheets. A slight increase in the size of the InSe-EGCG nanosheets indicates the formation of a stable coating of EGCG on the InSe surface. DLS measurements were carried out using a Malvern Nano Zetasizer ZEN3600 instrument. The samples were the same as the ones used for UV-vis measurements performed using a glass cuvette.

Figure S2 compares scanning electron microscopy with energy dispersive X-ray analysis (SEM-EDX) spectra of unmodified InSe nanosheets and EGCG-coated InSe nanosheets, both showing the elemental presence of In and Se. The samples were imaged with a FEI Nova NanoSEM 450 with an EDS detector (X-Max 50, Oxford Instruments). Sample preparation for SEM-EDX was done by placing the sample powders on double-sided carbon tape on an aluminum sample stub.

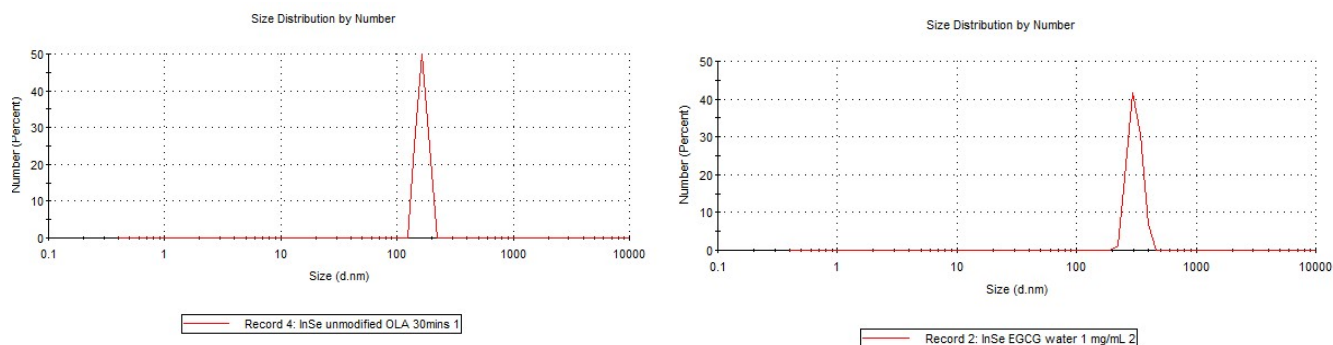

Figure S1: DLS size measurements of unmodified InSe nanosheets (left) versus EGCG-modified InSe nanosheets (right). There is a slight increase in size for InSe-EGCG nanosheets.

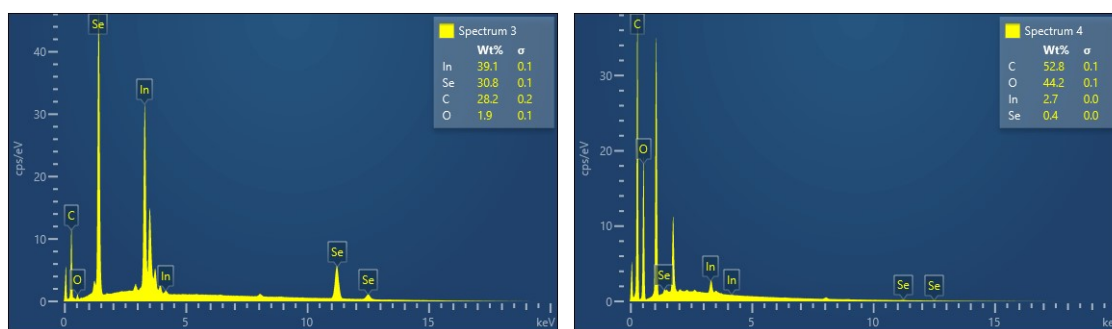

Figure S2: SEM-EDX analysis spectra of unmodified InSe nanosheets (left) versus EGCG-modified InSe nanosheets (right). Both the spectra show the presence of elemental In and Se.
